# Supplementary material for: Ultrastable cucurbit[6]uril-based multifunctional supramolecular assembly for efficient detection of nitroaromatic compounds and antibiotics
Source: Royal Society of Chemistry journal article supplement (doi:10.1039/d1nj03509f), 2021-01-01
Supplement: d1nj03509f1.pdf [file d1nj03509f1.pdf]

## Supporting information

# **A ultrastable cucurbit[6]uril-based multifunctional supramolecular assembly for efficient detection of nitroaromatic compounds and antibiotics**

Jing Guo, Lulu Shi, Mei Liu\*

School of Chemistry and Life Science, Advanced Institute of materials Science, Changchun University of Technology, Changchun 130012, China

\* Corresponding author Email addresses: liumei@ccut.edu.cn.

**Table S1** Crystal data and structure refinement for **1**

| Compound                              |                                                                                                  |
|---------------------------------------|--------------------------------------------------------------------------------------------------|
| Empirical formula                     | C <sub>144</sub> H <sub>136</sub> N <sub>76</sub> O <sub>56</sub> S <sub>4</sub> Zn <sub>2</sub> |
| Formula weight                        | 4086.26                                                                                          |
| Crystal system                        | Monoclinic                                                                                       |
| Space group                           | C2/m                                                                                             |
| a (Å)                                 | 31.654(5)                                                                                        |
| b (Å)                                 | 20.851(3)                                                                                        |
| c (Å)                                 | 15.488(2)                                                                                        |
| α (°)                                 | 90                                                                                               |
| β (°)                                 | 94.774(5)                                                                                        |
| γ (°)                                 | 90                                                                                               |
| V (Å <sup>3</sup> )                   | 10186(3)                                                                                         |
| Z                                     | 2                                                                                                |
| D <sub>c</sub> /(g cm <sup>-3</sup> ) | 1.332                                                                                            |
| μ/(mm <sup>-1</sup> )                 | 1.486                                                                                            |
| F(000)                                | 4208.0                                                                                           |
| θ range (°)                           | 5.08 - 101.482                                                                                   |
| R <sub>int</sub>                      | 0.0752                                                                                           |
| Parameters                            | 655                                                                                              |
| T (K)                                 | 170                                                                                              |
| goodness of fit                       | 1.127                                                                                            |
| Limiting indices                      | -31 ≤ h ≤ 29<br>-20 ≤ k ≤ 20<br>-15 ≤ l ≤ 15                                                     |
| R indices [I > 2σ(I)]                 | R1=0.1130,wR2=0.3023                                                                             |
| R indices (all data)                  | R1=0.1248,wR2=0.3129                                                                             |

**Table S2** Performance of reported MOFs for detecting TNP

| MOFs                                                                   | Solvent          | $K_{sv}$<br>( $M^{-1}$ ) | detection<br>limit | References |
|------------------------------------------------------------------------|------------------|--------------------------|--------------------|------------|
| $\{[Zn_8(L)_6(\mu_3-OH)_4(H_2O)_6] \cdot (DMF) \cdot (H_2O)_{2.5}\}_n$ | DMSO             | $2.5 \times 10^4$        | —                  | [30]       |
| $\{[Zn_3(mtrb)_3(btc)_2] \cdot 3H_2O\}_n$                              | MeOH             | $3.26 \times 10^4$       | 0.26 $\mu$ M       | [31]       |
| $\{[Cd_3(SDB)_3(TIB)](H_2O)_2(1,4-dioxane)(G)_x\}_n$                   | H <sub>2</sub> O | $2.43 \times 10^4$       | 0.15 $\mu$ M       | [32]       |
| $\{[Zn_2(L)(DMF)_3] \cdot 2DMF \cdot 2H_2O\}$                          | DMF              | $2.61 \times 10^4$       | 0.64 ppm           | [33]       |
| $\{[Cd_4(L)_2(L_2)_3(H_2O)_2](8DMF)(8H_2O)\}_n$                        | EtOH             | $3.89 \times 10^4$       | 1.98 ppm           | [34]       |
| <b>1</b>                                                               | H <sub>2</sub> O | $2.86 \times 10^4$       | 71 ppb             | This work  |

**Table S3** Performance of reported MOFs for detecting OTC and TC

| MOFs                                                                | Solvent          | $K_{sv}$                  | LOD          | Species | Ref.      |
|---------------------------------------------------------------------|------------------|---------------------------|--------------|---------|-----------|
| $[Zn_3(L)_2(1,4-bimb)_3]_n$                                         | H <sub>2</sub> O | $1.99 \times 10^5 M^{-1}$ | 0.15 $\mu$ M | TC      | [35]      |
| $[Zn(bpydb)(bimmb)_{0.5}]_n(1)$                                     | H <sub>2</sub> O | $1.28 \times 10^5 M^{-1}$ | 104 ppb      | TC      | [36]      |
| $\{[Zn_2(bpydb)_2(bimb)] \cdot [Zn(bpydb)(bimb)] \cdot H_2O\}_n(2)$ |                  | $7.96 \times 10^4 M^{-1}$ | 168 ppb      |         |           |
| ROD-Zn1                                                             | H <sub>2</sub> O | $2.75 \times 10^4 M^{-1}$ | 0.11 $\mu$ M | TC      | [37]      |
| ROD-Zn2                                                             |                  | $2.67 \times 10^4 M^{-1}$ | 0.12 $\mu$ M |         |           |
| $[Tb(HL)L(H_2O)]_n$                                                 | H <sub>2</sub> O | $2.18 \times 10^4 M^{-1}$ | 1.95 nM      | OTC     | [38]      |
|                                                                     |                  | $1.39 \times 10^4 M^{-1}$ | 2.77 nM      | TC      |           |
| <b>1</b>                                                            | H <sub>2</sub> O | $3.59 \times 10^4 M^{-1}$ | 153 ppb      | OTC     | This work |
|                                                                     |                  | $5.99 \times 10^4 M^{-1}$ | 148 ppb      | TC      |           |

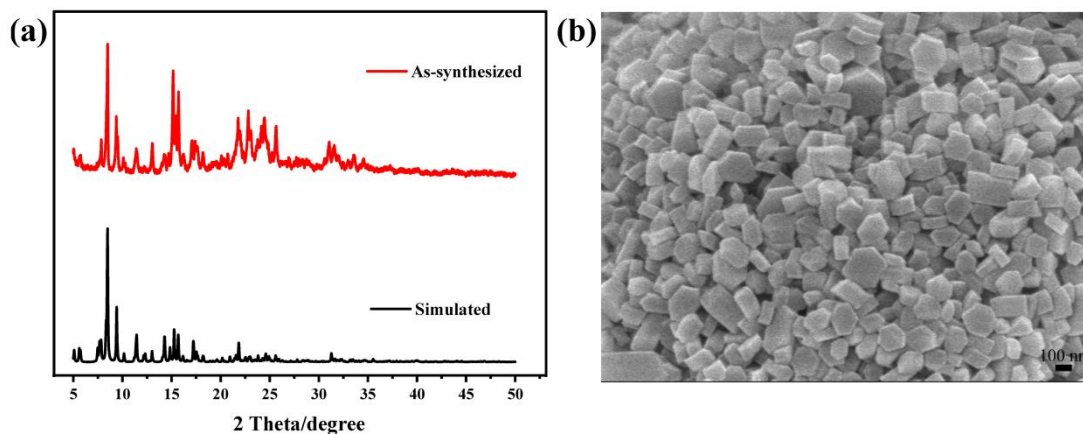

**Fig. S1** (a) The PXRD pattern spectra of **1** and the simulated spectra. (b) The SEM image of the ground sample for the sensing experiment.

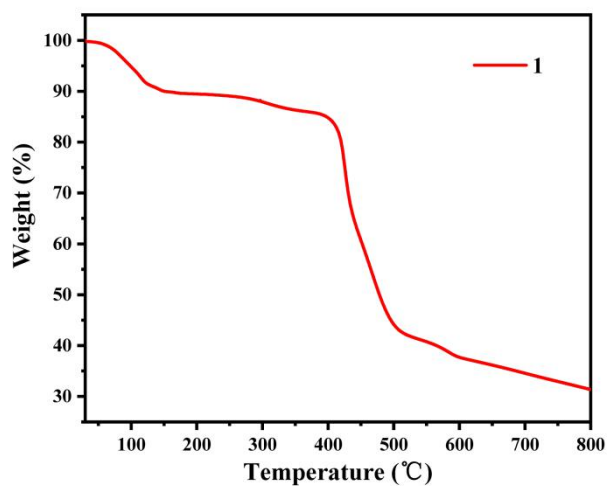

**Fig. S2** TGA curves of **1** under atmosphere of  $N_2$  ( $5\text{ }^\circ\text{Cmin}^{-1}$ )

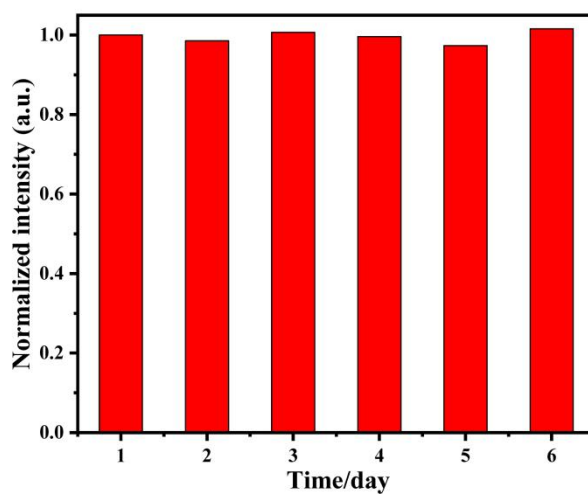

**Fig. S3** Luminescence spectra of **1** dispersed in water with different times.

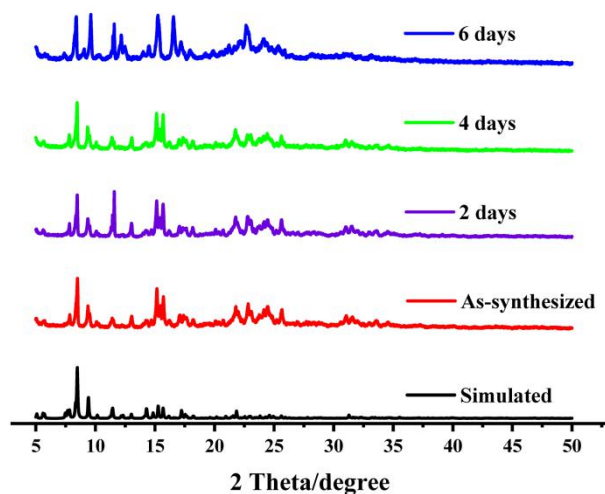

**Fig. S4** PXRD patterns of 1 after soaked in water with different times.

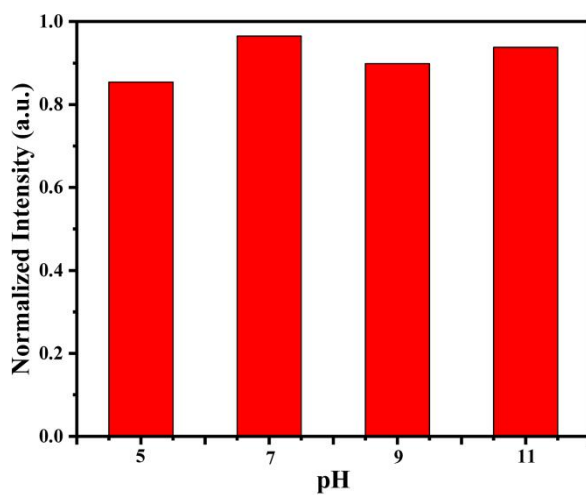

**Fig. S5** Luminescence spectra of 1 dispersed in aqueous solution with different pH value.

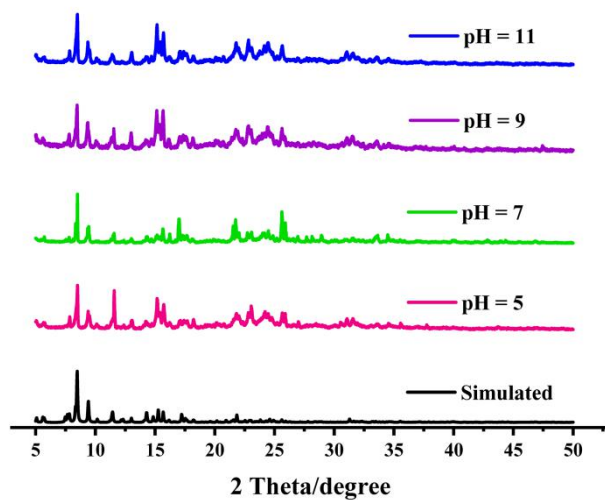

**Fig. S6** PXRD patterns of 1 after soaked in aqueous solution with different pH value.

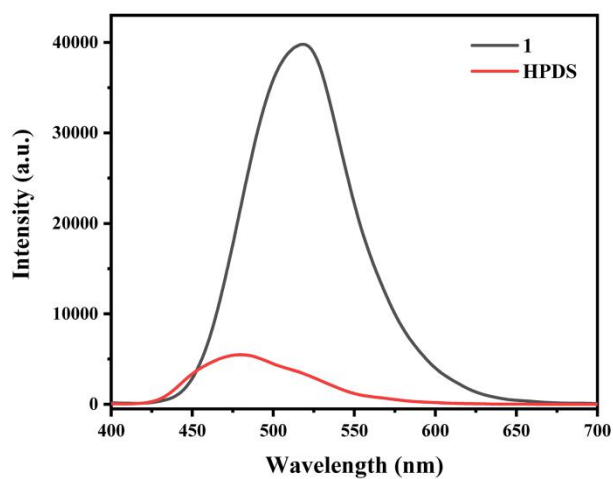

Fig. S7 The luminescent spectrum of **1** and HQDS in solid states.

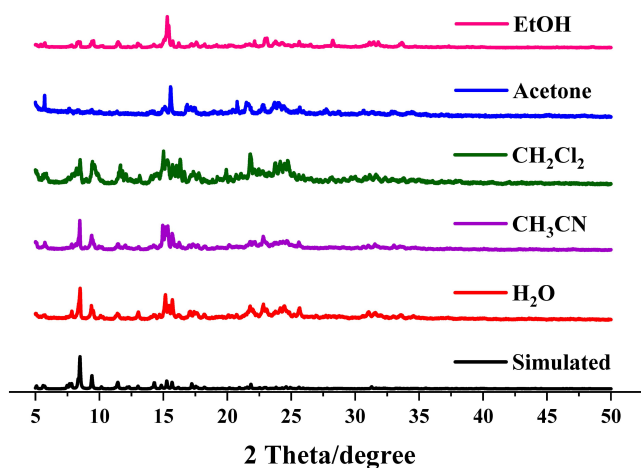

Fig. S8 PXRD patterns of **1** after soaked in common solvents.

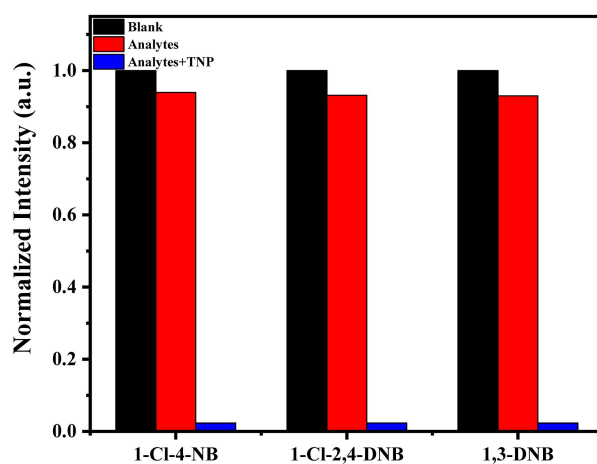

Fig. S9 Relative intensities of **1** to various NACs. The black bars represent the

emission intensities of **1** in water, the red bars represent the emission intensities of **1** in the individual aqueous solutions of NACs (1 mM), and the blue bars represent a change of the emission intensities upon subsequent addition of TNP (1 mM) to the above NACs solutions.

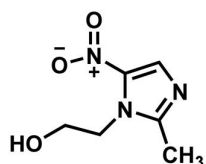

MDZ

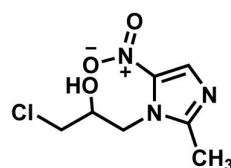

ODZ

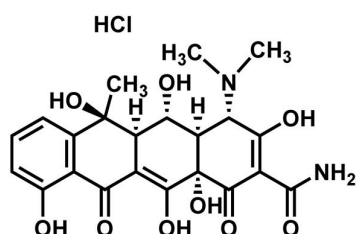

OTC

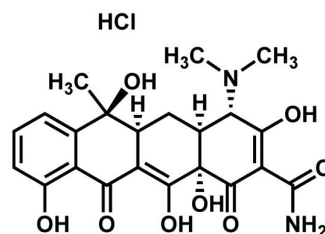

TC

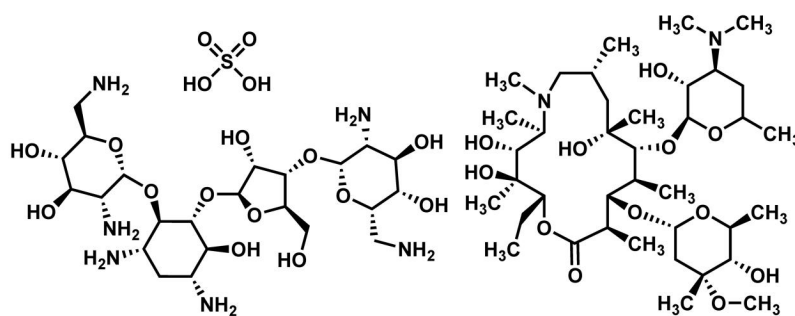

NEO

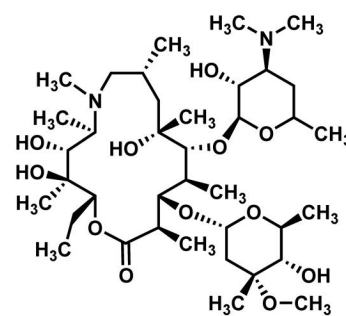

AZM

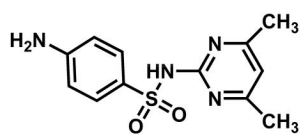

SDZ

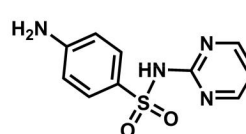

SMZ

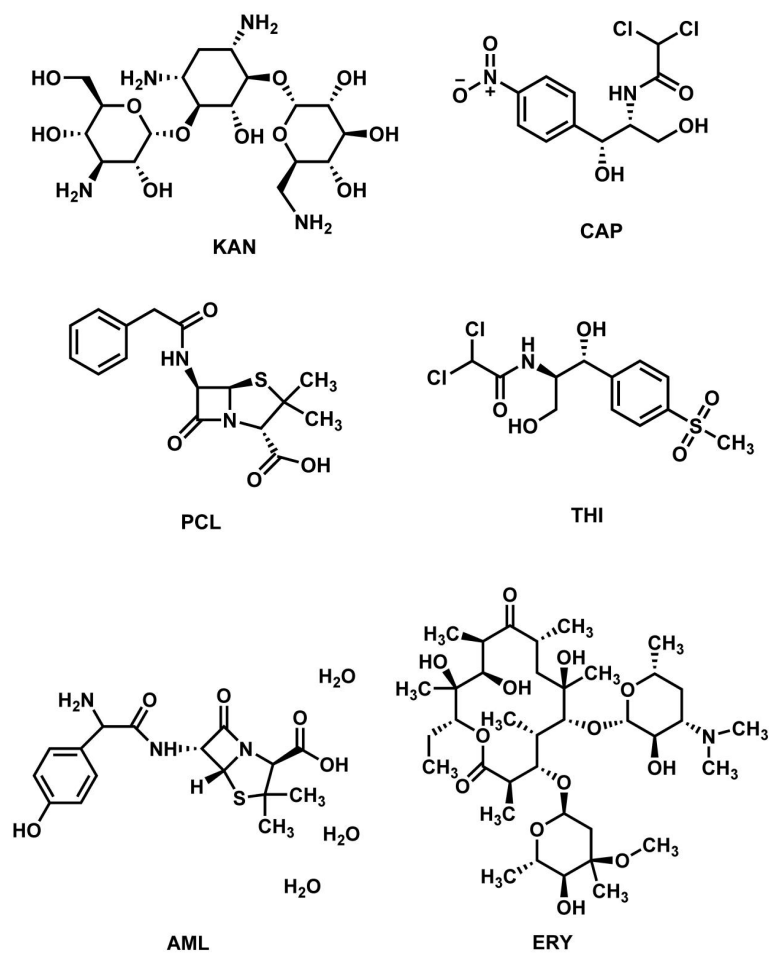

**Fig. S10** Selected molecular structures of antibiotic substances.

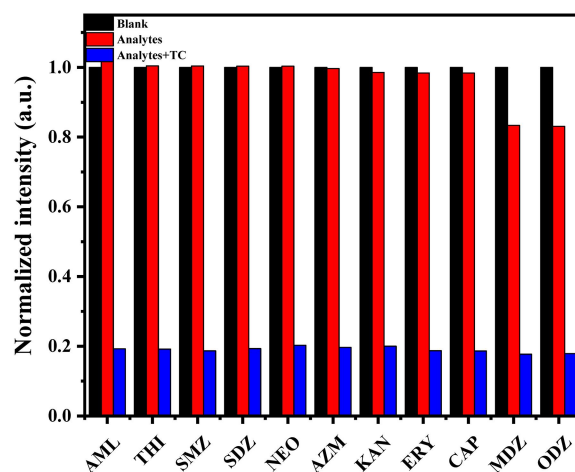

**Fig. S11** Relative intensities of **1** to various antibiotics. The black bars represent the emission intensities of **1** in water, the red bars represent the emission intensities of **1** in the individual aqueous solutions of antibiotics (1 mM), and the blue bars represent



a change of the emission intensities upon subsequent addition of TC (1 mM) to the above antibiotics solutions.

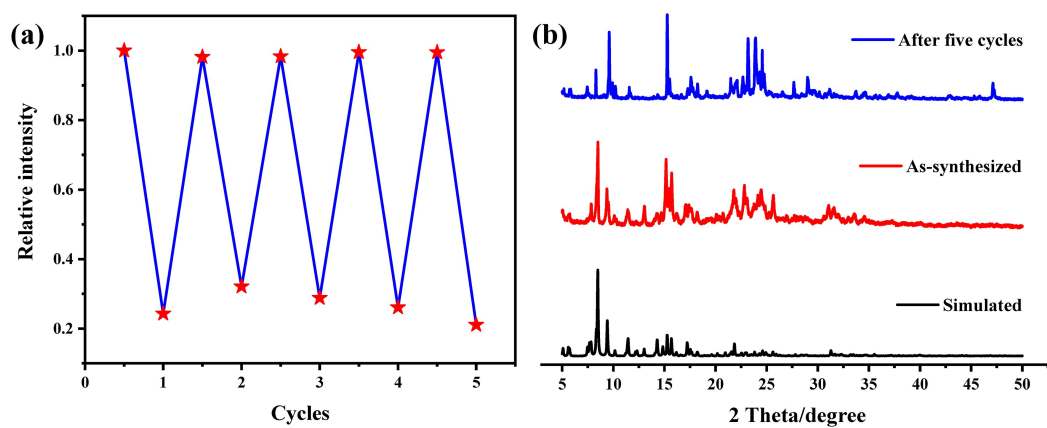

**Fig. S12.** (a) The recyclability tests of **1** in water. (b) The PXRD patterns of **1** after five cycles.

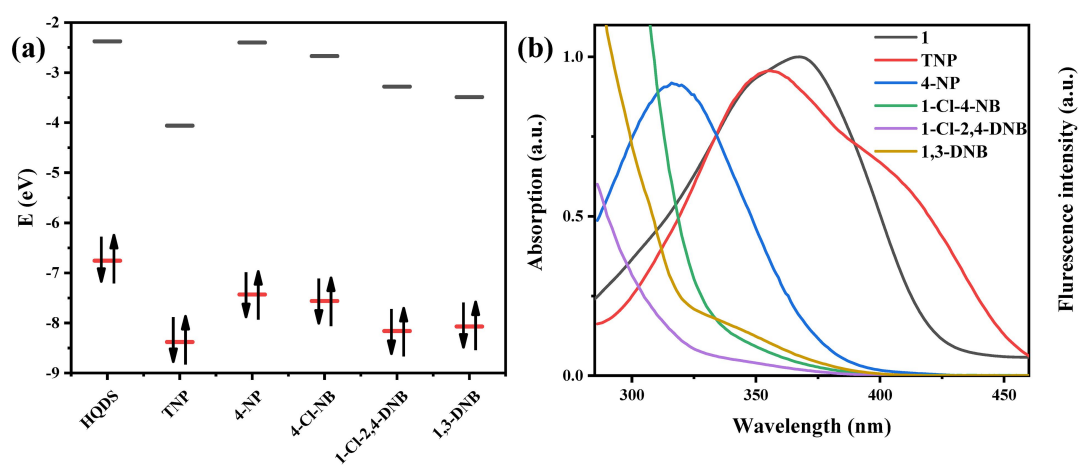

**Fig. S13** (a) Theoretical HOMO and LUMO energies for HQDS, 4-NP and TNP; (b)

UV-vis absorption spectra of 4-NP and TNP and emission spectra of **1** in water.

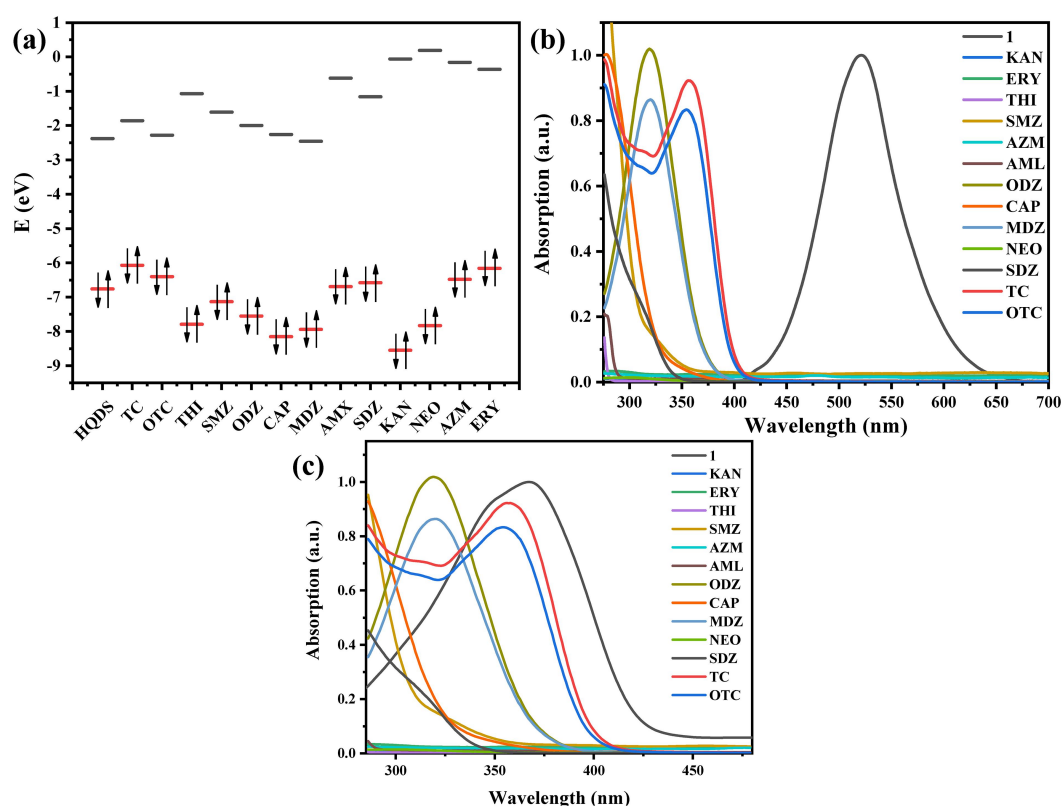

**Fig. S14** (a) Theoretical HOMO and LUMO energies for HQDS, OTC and TC; (b) UV-visible spectra of antibiotics in water; (c) UV-vis absorption spectra of OTC and TC and excitation spectra of **1** in water.
